# Supplementary material for: Hybrid n-type Sn1−xTaxO2nanowalls bonded with graphene-like layers as high performance electrocatalysts for flexible energy conversion devices
Source: Royal Society of Chemistry journal article supplement (doi:10.1039/c7ta00893g), 2017-01-01
Supplement: c7ta00893g1.pdf [file c7ta00893g1.pdf]

## Hybrid n-type $\text{Sn}_{1-x}\text{Ta}_x\text{O}_2$ nanowalls bonded with graphene-like layers as high performance electrocatalyst for flexible energy conversion device

Yandong Duan,<sup>‡ab</sup> Nianqing Fu,<sup>‡c</sup> Sibai Li,<sup>‡a</sup> Xiaoyang Yang,<sup>a</sup> Jiaxin Zheng,<sup>\*a</sup> Yuan Lin,<sup>\*ab</sup> and Feng Pan<sup>\*a</sup>

<sup>a</sup>School of Advanced Materials, Peking University, Peking University Shenzhen Graduate School, Shenzhen 518055, China

<sup>b</sup>Beijing National Laboratory for Molecular Sciences, Key Laboratory of Photochemistry, Institute of Chemistry, Chinese Academy of Sciences, Beijing 100190, China

<sup>c</sup>School of Material Science and Engineering, South China University of Technology, Guangzhou 510640, China

\*Corresponding author.

Email address: [panfeng@pkusz.edu.cn](mailto:panfeng@pkusz.edu.cn) (F. Pan)

<sup>‡</sup>These authors contributed equally to this work.

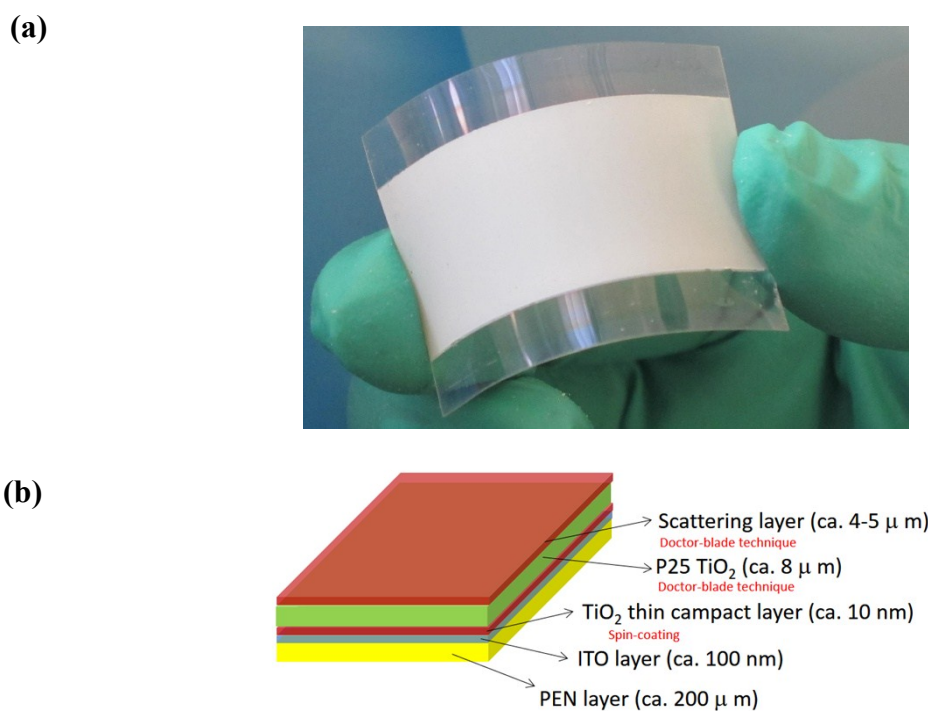

**Fig. S1** (a) Digital photograph of plastic working electrode in this study; (b) Configuration of the cross-section for the working electrode. The numbers in brackets are thicknesses for every layer.

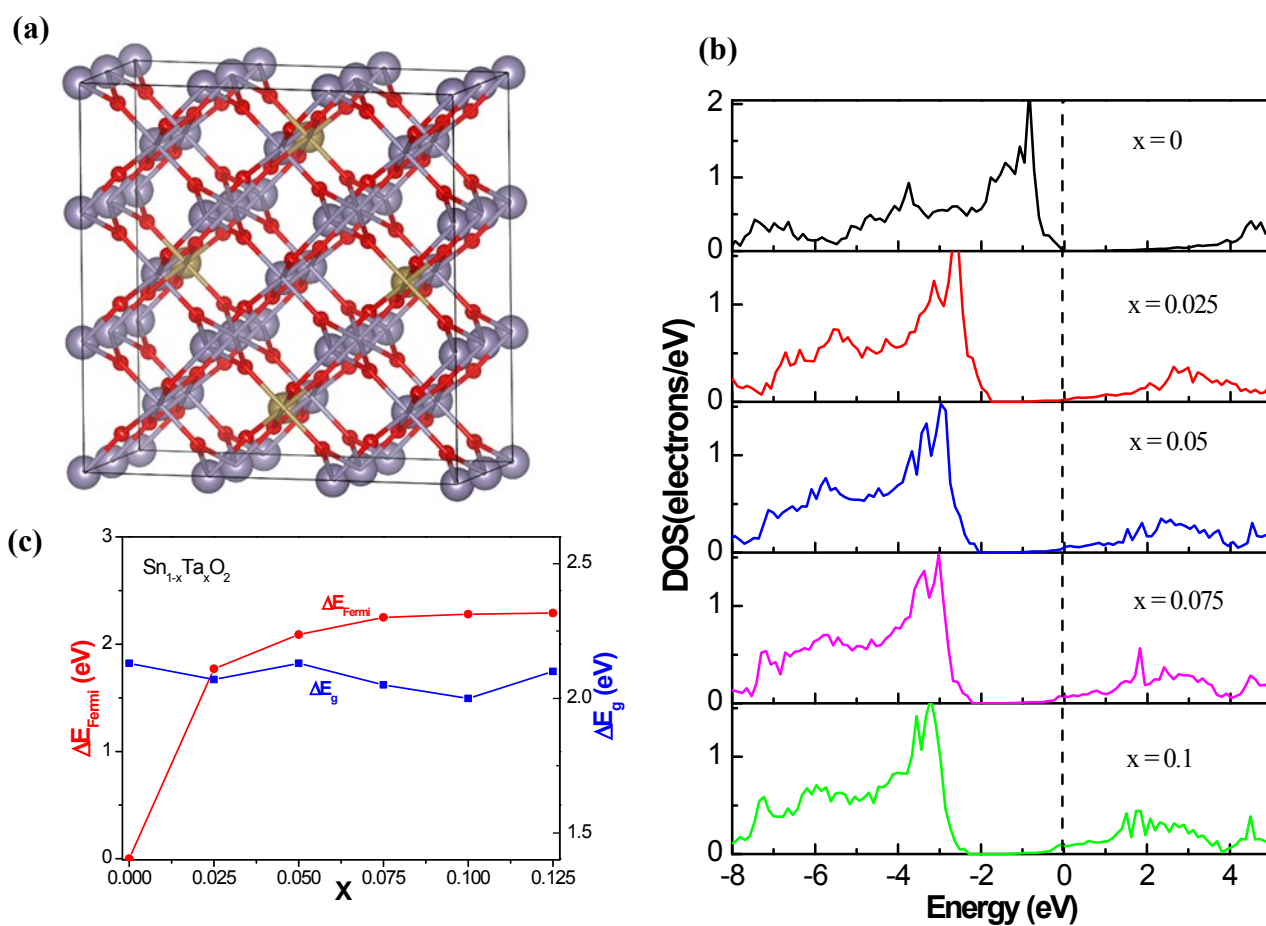

**Fig. S2** (a) Configurations of  $\text{Sn}_{0.9}\text{Ta}_{0.1}\text{O}_2$ . Grey ball: Sn; green ball: Ta; red ball: O. (b) Total density of states for  $\text{Sn}_{1-x}\text{Ta}_x\text{O}_2$  when  $x = 0, 0.025, 0.05, 0.075,$  and  $0.1,$  respectively. The energy of the valence band maximum of intrinsic  $\text{SnO}_2$  is set to 0. (c) Fermi level shift (red line) and band gap (blue line) as a function of the level of Sn substitution by Ta.

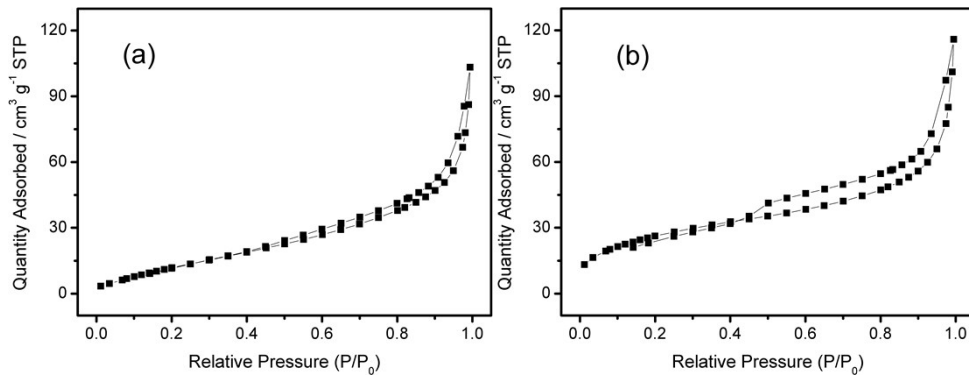

**Fig. S3** N<sub>2</sub> adsorption-desorption isotherms of (a) Sn<sub>0.925</sub>Ta<sub>0.075</sub>O<sub>2</sub> and (b) Sn<sub>0.925</sub>Ta<sub>0.075</sub>O<sub>2</sub>/C.

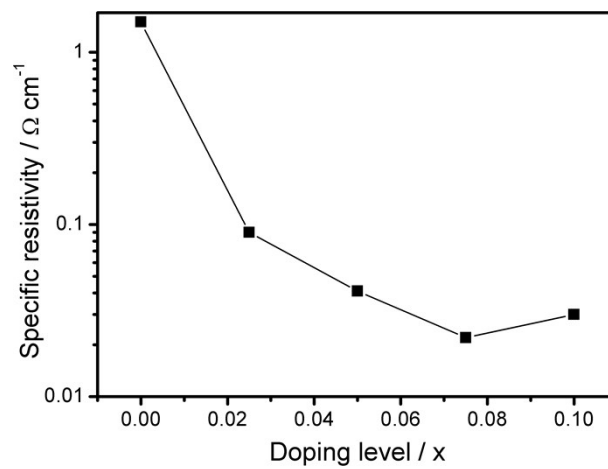

**Fig. S4** Specific resistivity as a function of doping level for Sn<sub>1-x</sub>Ta<sub>x</sub>O<sub>2</sub> nanowall films.

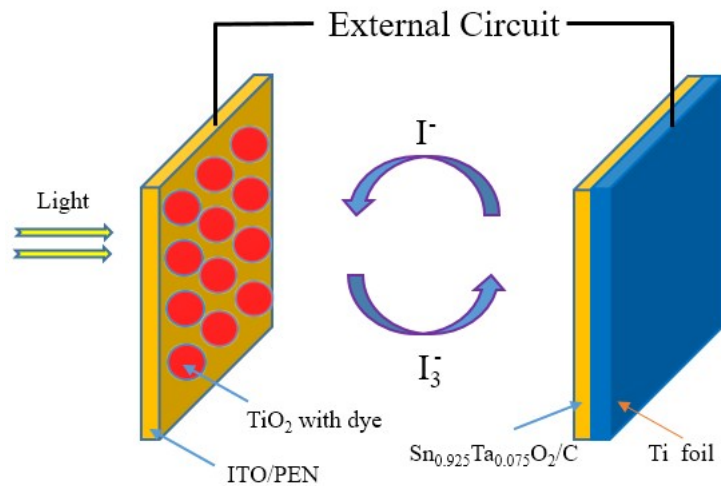

**Fig. S5** Configuration of full flexible dye-sensitized solar cells in this study.

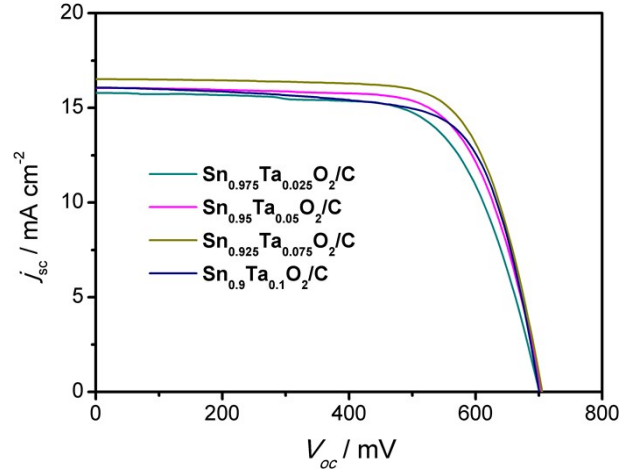

**Fig. S6**  $j$ - $V$  curves based on  $\text{Sn}_{1-x}\text{Ta}_x\text{O}_2/\text{C}$  hybrid structures.

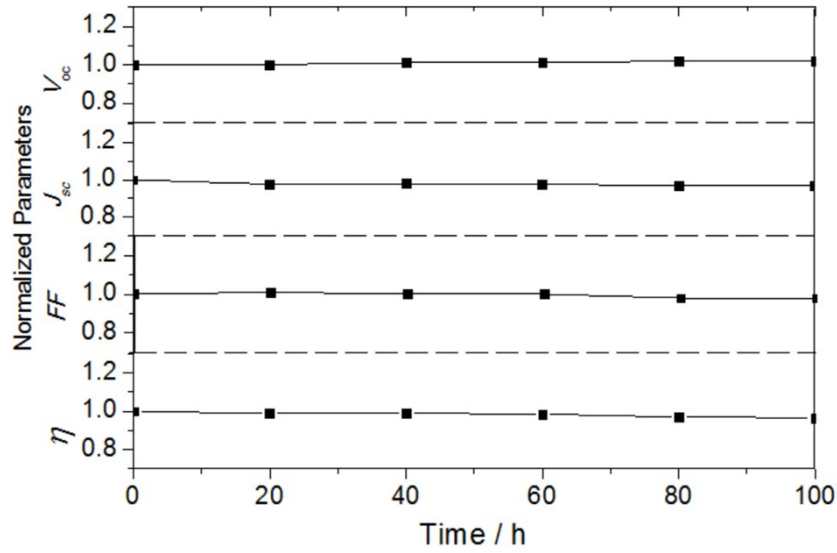

**Fig. S7** The long-term stability of full flexible DSSCs assembled with  $\text{Sn}_{0.925}\text{Ta}_{0.075}\text{O}_2/\text{C}$  based electrode.

**Table S1** Results of the impedance measurements.

| samples                                                 | $R_s$ | $R_{ct} / \Omega \text{ cm}^{-2}$ | $\text{mF} / \text{cm}^{-2}$ |
|---------------------------------------------------------|-------|-----------------------------------|------------------------------|
| Pt                                                      | 7.2   | 2.0                               | 0.14                         |
| $\text{SnO}_2$                                          | 20.2  | 8.2                               | 1.66                         |
| $\text{SnO}_2\text{-C}$                                 | 11.5  | 3.6                               | 2.10                         |
| $\text{Sn}_{0.975}\text{Ta}_{0.025}\text{O}_2/\text{C}$ | 10.3  | 2.8                               | 2.27                         |
| $\text{Sn}_{0.95}\text{Ta}_{0.05}\text{O}_2/\text{C}$   | 10.0  | 2.6                               | 2.43                         |
| $\text{Sn}_{0.925}\text{Ta}_{0.075}\text{O}_2/\text{C}$ | 9.0   | 2.1                               | 2.36                         |
| $\text{Sn}_{0.9}\text{Ta}_{0.1}\text{O}_2/\text{C}$     | 11.3  | 2.8                               | 2.23                         |
